# Supplementary material
Source: PubMed Central journal article supplement (PMC10824507)
Supplement: NIHMS1938769-supplement-1.pdf [file NIHMS1938769-supplement-1.pdf]

**Supplementary Table 1**

Three-way classifier comparison for n=155 patients

| <b>TCGA Category</b>   | <b>Consensus</b> | <b>MD Anderson</b> | <b># of Patients</b> |
|------------------------|------------------|--------------------|----------------------|
| Basal/Sq plus Neuronal | Ba Sq NE         | Basal              | 43                   |
| Basal/Sq plus Neuronal | Ba Sq NE         | p53-like           | 5                    |
| Basal/Sq plus Neuronal | Ba Sq NE         | Luminal            | 1                    |
| Basal/Sq plus Neuronal | Luminal          | Luminal            | 3                    |
| Basal/Sq plus Neuronal | Stroma-rich      | p53-like           | 2                    |
| Basal/Sq plus Neuronal | Stroma-rich      | Luminal            | 1                    |
| Luminal                | Ba Sq NE         | Basal              | 1                    |
| Luminal                | Luminal          | Basal              | 1                    |
| Luminal                | Luminal          | p53-like           | 21                   |
| Luminal                | Luminal          | Luminal            | 49                   |
| Luminal                | Stroma-rich      | Basal              | 1                    |
| Luminal                | Stroma-rich      | p53-like           | 4                    |
| Luminal infiltrated    | Ba Sq NE         | Basal              | 1                    |
| Luminal infiltrated    | Luminal          | p53-like           | 5                    |
| Luminal infiltrated    | Luminal          | Luminal            | 1                    |
| Luminal infiltrated    | Stroma-rich      | Basal              | 2                    |
| Luminal infiltrated    | Stroma-rich      | p53-like           | 13                   |
| Luminal infiltrated    | Stroma-rich      | Luminal            | 1                    |
|                        |                  | <b>Total</b>       | <b>155</b>           |
